# Supplementary material
Source: PubMed Central journal article supplement (PMC5726898)
Supplement: NIHMS904974-supplement-Supp_PDF.pdf [file NIHMS904974-supplement-Supp_PDF.pdf]

## **SUPPLEMENTAL MATERIAL**

### **Risk Reclassification**

**Supplementary Table 1.** Baseline Patient and Imaging Characteristics by Cardiovascular Death

**Supplementary Figure 1.** Risk Reclassification

**Supplementary Figure 2.** Competing Risk Analysis

**Supplementary Figure 3.** All-Cause Mortality

**Supplementary Figure 4.** Incremental Prognostic Value of Maximal Myocardial Blood Flow by Severity of Coronary Flow Reserve Impairment

## **Risk Reclassification**

### ***Net reclassification index (NRI) for independent prognostic value of coronary flow reserve (CFR) or maximal myocardial blood flow (MBF):***

*Pre-risk model* included age, sex, hypertension, diabetes, dyslipidemia, dialysis, tobacco use, body mass index, prior history of coronary artery disease, left ventricular ejection fraction, and summed stress score as an estimate of the amount of myocardial scar and/or ischemia.

*Post-risk models*, in addition, also included CFR or maximal MBF to assess NRIs for independent prognostic value of CFR or maximal MBF respectively.

The addition of CFR to the pre-risk model resulted in categorical NRI of 5.2% (95% CI: 1.1–9.5 %) across clinically meaningful risk categories of <1%, 1% to 3%, and >3% annual rate of cardiovascular death. The continuous NRI was 38.9% (95% CI: 25.9–53.1 %). The addition of maximal MBF to the pre-risk model resulted in categorical NRI of 1.4% (95% CI: -1.8–4.5 %) across risk categories of <1%, 1% to 3%, and >3% annual rate of cardiovascular death. The continuous NRI was 25.6% (95% CI: 12.7–38.2 %).

### ***NRI for incremental prognostic value of maximal MBF over CFR:***

*Pre-risk model* included age, sex, hypertension, diabetes, dyslipidemia, dialysis, tobacco use, body mass index, prior history of coronary artery disease, left ventricular ejection fraction, and summed stress score as an estimate of the amount of myocardial scar and/or ischemia, and CFR as binary (impaired or not).

*Post-risk model* included clinical risk factors described above and a categorical variable with 4 categories: both CFR and maximal MBF impaired, only CFR impaired, only maximal MBF impaired and neither impaired.

The addition of maximal MBF to the pre-risk model with CFR resulted in categorical NRI of 0.7% (95% CI: -1.7–3.4 %) across risk categories of <1%, 1% to 3%, and >3% annual rate of cardiovascular death. The continuous NRI was -12.0% (95% CI: -24.9–2.5 %).

**Supplementary Table 1.** Baseline Patient and Imaging Characteristics by Cardiovascular Death

| <b>Variable</b>                                 | <b>CV Death<br/>(n = 392)</b> | <b>No CV Death<br/>(n = 3637)</b> | <b>All Patients<br/>(n=4029)</b> |
|-------------------------------------------------|-------------------------------|-----------------------------------|----------------------------------|
| <b>Demographics</b>                             |                               |                                   |                                  |
| Age, y                                          | 75 (65-82)                    | 65 (56-74)                        | 66 (57-75)                       |
| Male                                            | 246 (63.0)                    | 1749 (48.1)                       | 1995 (49.5)                      |
| Race                                            |                               |                                   |                                  |
| White                                           | 266 (67.9)                    | 2346 (64.5)                       | 2612 (64.8)                      |
| Black                                           | 55 (14.0)                     | 601 (16.5)                        | 656 (16.3)                       |
| Other/Unknown                                   | 71 (18.1)                     | 690 (19.0)                        | 761 (18.9)                       |
| <b>Cardiovascular Risk Factors</b>              |                               |                                   |                                  |
| Hypertension                                    | 353 (90.1)                    | 2978 (81.9)                       | 3331 (82.7)                      |
| Diabetes                                        | 183 (46.7)                    | 1266 (34.8)                       | 1449 (36.0)                      |
| Dyslipidemia                                    | 282 (71.9)                    | 2468 (67.9)                       | 2750 (68.3)                      |
| Body Mass Index, kg/m <sup>2</sup>              | 27.0 (23.5-31.2)              | 29.1 (25.2-34.6)                  | 28.9 (25.1-34.3)                 |
| Body Mass Index $\geq$ 30                       | 123 (31.4)                    | 1644 (45.2)                       | 1767 (43.9)                      |
| Family history of CAD                           | 80 (20.4)                     | 948 (26.1)                        | 1028 (25.5)                      |
| Tobacco use                                     | 37 (9.4)                      | 353 (9.7)                         | 390 (9.7)                        |
| Dialysis                                        | 32 (8.2)                      | 156 (4.3)                         | 188 (4.7)                        |
| <b>Cardiovascular History</b>                   |                               |                                   |                                  |
| Known CAD                                       | 261 (66.6)                    | 1392 (38.3)                       | 1653 (41.0)                      |
| Prior MI                                        | 193 (49.2)                    | 939 (25.8)                        | 1132 (28.1)                      |
| Prior PCI                                       | 121 (30.9)                    | 768 (21.1)                        | 889 (22.1)                       |
| Prior CABG                                      | 113 (28.8)                    | 448 (12.3)                        | 561 (13.9)                       |
| Early Revascularization ( $\leq$ 90 d post PET) | 43 (11.1)                     | 364 (10.0)                        | 407 (10.1)                       |
| Late Revascularization ( $>$ 90 d post PET)     | 34 (8.6)                      | 216 (5.9)                         | 250 (6.2)                        |
| Heart Failure                                   | 73 (18.6)                     | 182 (5.0)                         | 255 (6.3)                        |
| Peripheral Vascular Disease                     | 56 (14.3)                     | 214 (5.9)                         | 270 (6.7)                        |
| Cerebrovascular Disease                         | 37 (9.4)                      | 233 (6.4)                         | 270 (6.7)                        |
| <b>Medications</b>                              |                               |                                   |                                  |
| Aspirin                                         | 270 (68.9)                    | 2254 (62.0)                       | 2524 (62.6)                      |
| Beta-blockers                                   | 305 (77.8)                    | 2302 (63.3)                       | 2607 (64.7)                      |
| Lipid Lowering                                  | 286 (73.0)                    | 2298 (63.2)                       | 2584 (64.1)                      |
| ACE Inhibitors                                  | 170 (43.4)                    | 1408 (38.7)                       | 1578 (39.2)                      |
| Insulin                                         | 108 (27.6)                    | 580 (15.9)                        | 688 (17.1)                       |
| <b>Indications</b>                              |                               |                                   |                                  |
| Chest pain                                      | 112 (28.6)                    | 1701 (46.8)                       | 1813 (45.0)                      |
| Dyspnea                                         | 170 (43.4)                    | 1009 (27.7)                       | 1179 (29.3)                      |
| Pre-operative                                   | 62 (15.8)                     | 510 (14.0)                        | 572 (14.2)                       |
| <b>Stress Agent</b>                             |                               |                                   |                                  |

| <b>Variable</b>                                                   | <b>CV Death<br/>(n = 392)</b> | <b>No CV Death<br/>(n = 3637)</b> | <b>All Patients<br/>(n=4029)</b> |
|-------------------------------------------------------------------|-------------------------------|-----------------------------------|----------------------------------|
| Adenosine                                                         | 24 (6.2)                      | 213 (5.9)                         | 237 (5.9)                        |
| Dipyridamole                                                      | 201 (51.5)                    | 1279 (35.3)                       | 1480 (36.9)                      |
| Dobutamine                                                        | 17 (4.4)                      | 143 (3.9)                         | 160 (4.0)                        |
| Regadenoson                                                       | 148 (37.9)                    | 1991 (54.9)                       | 2139 (53.3)                      |
| <b>Radiotracer</b>                                                |                               |                                   |                                  |
| N-13 Ammonia                                                      | 18 (4.6)                      | 533 (14.7)                        | 551 (13.7)                       |
| Rubidium-82                                                       | 374 (95.4)                    | 3104 (85.3)                       | 3478 (86.3)                      |
| <b>Hemodynamic Parameters</b>                                     |                               |                                   |                                  |
| HR, bpm                                                           |                               |                                   |                                  |
| Rest                                                              | 71 (63-80)                    | 69 (61-78)                        | 69 (61-78)                       |
| Stress                                                            | 78 (70-90)                    | 85 (75-96)                        | 85 (74-96)                       |
| Systolic BP, mm Hg                                                |                               |                                   |                                  |
| Rest                                                              | 138 (122-163)                 | 145 (128-164)                     | 144 (127-164)                    |
| Stress                                                            | 127 (109-151)                 | 134 (117-154)                     | 134 (117-154)                    |
| Diastolic BP, mm Hg                                               |                               |                                   |                                  |
| Rest                                                              | 69 (59-79)                    | 73 (65-81)                        | 72 (64-81)                       |
| Stress                                                            | 61 (54-73)                    | 65 (58-74)                        | 65 (58-74)                       |
| Rate Pressure Product, mm Hg*bpm                                  | 9792 (8311-11830)             | 9987 (8448-11859)                 | 9965 (8436-11859)                |
| <b>Imaging Parameters</b>                                         |                               |                                   |                                  |
| Rest LVEF, %                                                      | 46 (32-57)                    | 58 (49-66)                        | 57 (47-65)                       |
| LVEF $\geq$ 50, %                                                 | 170 (43.5)                    | 2670 (73.6)                       | 2840 (70.7)                      |
| Scar, %                                                           | 2.9 (0-14.7)                  | 0 (0-1.5)                         | 0 (0-2.9)                        |
| Ischemia, %                                                       | 2.9 (0-10.3)                  | 0 (0-5.9)                         | 0 (0-5.9)                        |
| Scar + Ischemia, %                                                | 8.8 (0-29.4)                  | 0 (0-10.3)                        | 0 (0-11.8)                       |
| CFR                                                               | 1.37 (1.12-1.68)              | 1.77 (1.39-2.25)                  | 1.72 (1.35-2.20)                 |
| Maximal MBF, ml $\cdot$ g <sup>-1</sup> $\cdot$ min <sup>-1</sup> | 1.28 (0.94-1.84)              | 1.79 (1.28-2.43)                  | 1.75 (1.24-2.39)                 |
| Resting MBF, ml $\cdot$ g <sup>-1</sup> $\cdot$ min <sup>-1</sup> | 0.93 (0.74-1.24)              | 0.99 (0.78-1.28)                  | 0.98 (0.78-1.28)                 |

Continuous variables are presented as median [25<sup>th</sup>–75<sup>th</sup> percentile]; Categorical variables are presented as n (%). BP, blood pressure; CABG, coronary artery bypass grafting; CAD, coronary artery disease; CFR, coronary flow reserve; CV, cardiovascular; HR, heart rate; LVEF, left ventricular ejection fraction; MBF, myocardial blood flow; MI, myocardial infarction; PCI, percutaneous coronary intervention; SBP, systolic blood pressure

## Supplementary Figure 1. Risk Reclassification

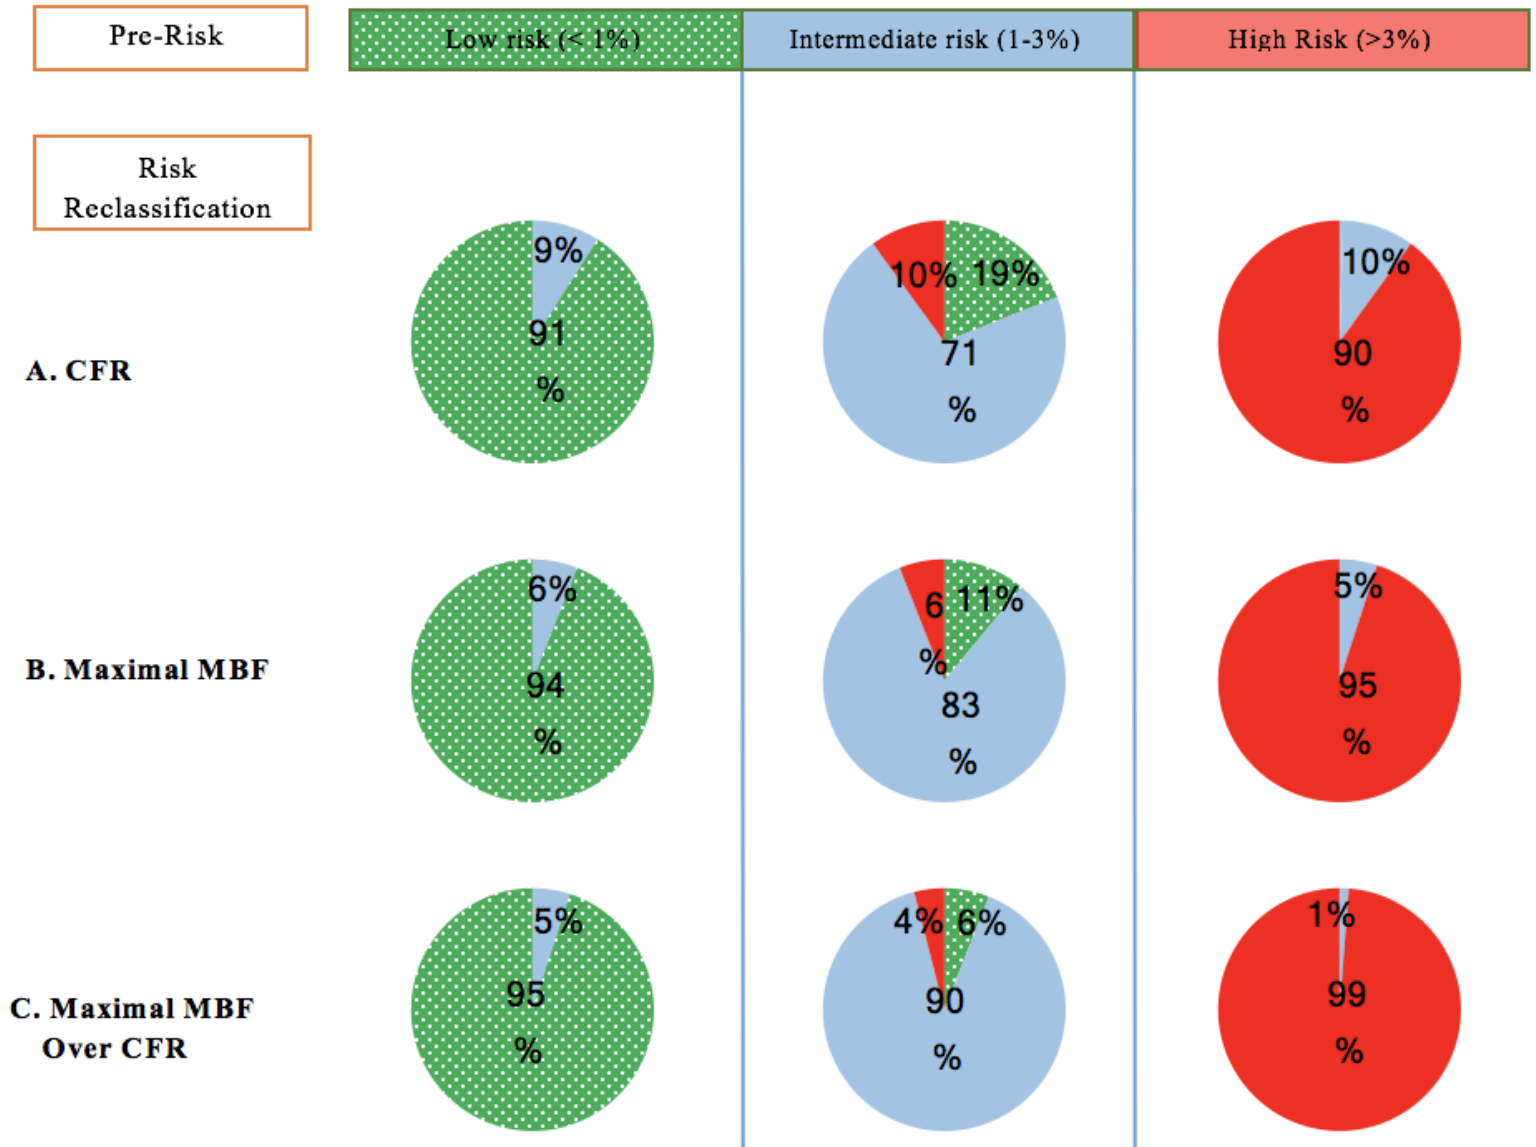

Figure shows risk reclassification at 2-year follow-up using threshold annual rates of cardiac mortality of 1% and 3% based on the American College of Cardiology/American Heart Association guidelines for the management of patients with stable ischemic heart disease. Pie charts indicate percentage of patients who are reclassified to another risk category. Risk categories are color-coded: low risk: patterned green; intermediate risk: solid light blue; high risk: solid dark red.

*Pre-Risk models* includes: age, sex, hypertension, diabetes, dyslipidemia, dialysis, tobacco use, body mass index, known coronary artery disease, left ventricular ejection fraction and amount of myocardial scar and ischemia. Pre-risk model for risk-reclassification by addition of maximal MBF over CFR also includes CFR as binary variable (impaired versus not impaired). *Post-risk models* include CFR (A), maximal MBF (B) or a combination of both (C) as a 4-level categorical variable (both impaired/only CFR impaired/only maximal MBF impaired/neither impaired). CFR, coronary flow reserve; MBF, myocardial blood flow

**Supplementary Figure 2. Competing Risk Analysis**

| Group                               | Unadjusted  |                  |         | Adjusted    |                  |         |
|-------------------------------------|-------------|------------------|---------|-------------|------------------|---------|
|                                     | Forest Plot | HR (95% CI)      | p-value | Forest Plot | HR (95% CI)      | p-value |
| <b>Independent Prognostic Value</b> |             |                  |         |             |                  |         |
| CFR                                 |             | 3.19 (2.56-3.98) | <0.001  |             | 1.70 (1.34-2.15) | <0.001  |
| Maximal MBF                         |             | 2.20 (1.85-2.61) | <0.001  |             | 1.32 (1.08-1.61) | 0.01    |
| <b>Incremental Prognostic Value</b> |             |                  |         |             |                  |         |
| CFR                                 |             | 2.27 (1.74-2.97) | <0.001  |             | 1.64 (1.25-2.16) | <0.001  |
| Maximal MBF                         |             | 1.50 (1.23-1.82) | <0.001  |             | 1.06 (0.85-1.32) | 0.6     |

Figure shows independent and incremental prognostic value of CFR and maximal MBF using competing risk analysis. Non-CV death was modeled as a competing risk for CV death using Fine and Gray competing risk model. Hazard ratios are expressed per unit decrease in CFR or maximal MBF. Adjusted Cox model includes the following covariates: age, sex, hypertension, diabetes, dyslipidemia, dialysis, body mass index, known coronary artery disease, left ventricular ejection fraction, amount of myocardial scar/ischemia, revascularization post-PET, rate-pressure-product, type of radiotracer or stress agent. CFR, coronary flow reserve; CI, confidence interval; CV, cardiovascular; HR, hazard ratio; MBF, myocardial blood flow; PET, positron emission tomography

**Supplementary Figure 3. All-Cause Mortality**

| Group                               | Unadjusted                                                                        |                  |         | Adjusted                                                                            |                  |         |
|-------------------------------------|-----------------------------------------------------------------------------------|------------------|---------|-------------------------------------------------------------------------------------|------------------|---------|
|                                     | Forest Plot                                                                       | HR (95% CI)      | p-value | Forest Plot                                                                         | HR (95% CI)      | p-value |
| <b>Independent Prognostic Value</b> |                                                                                   |                  |         |                                                                                     |                  |         |
| CFR                                 |  | 2.40 (2.14-2.69) | <0.001  |  | 1.73 (1.52-1.97) | <0.001  |
| Maximal MBF                         |  | 1.63 (1.50-1.77) | <0.001  |  | 1.28 (1.15-1.41) | <0.001  |
| <b>Incremental Prognostic Value</b> |                                                                                   |                  |         |                                                                                     |                  |         |
| CFR                                 |  | 2.07 (1.80-2.37) | <0.001  |  | 1.72 (1.48-2.01) | <0.001  |
| Maximal MBF                         |  | 1.19 (1.08-1.31) | <0.001  |  | 1.00 (0.89-1.13) | 0.9     |

Figure shows independent and incremental prognostic value of CFR and maximal MBF for predicting all-cause mortality. Hazard ratios are expressed per unit decrease in CFR or maximal MBF. Adjusted Cox model includes the following covariates: age, sex, hypertension, diabetes, dyslipidemia, dialysis, body mass index, known coronary artery disease, left ventricular ejection fraction, amount of myocardial scar/ischemia, revascularization post-PET, rate-pressure-product, type of radiotracer or stress agent. CFR, coronary flow reserve; CI, confidence interval; HR, hazard ratio; MBF, myocardial blood flow; PET, positron emission tomography

**Supplementary Figure 4. Incremental Prognostic Value of Maximal Myocardial Blood Flow by Severity of Coronary Flow Reserve Impairment**

| Group                                          | CV Deaths | Total patients | <u>Unadjusted</u> |                  |         | <u>Adjusted</u> |                  |         |
|------------------------------------------------|-----------|----------------|-------------------|------------------|---------|-----------------|------------------|---------|
|                                                |           |                | Forest Plot       | HR (95% CI)      | p-value | Forest Plot     | HR (95% CI)      | p-value |
| <b>Mild to Moderately Impaired CFR (1.5-2)</b> | 107       | 1222           |                   | 1.57 (1.17-2.09) | 0.003   |                 | 1.11 (0.78-1.57) | 0.6     |
| <b>Severely Impaired CFR (&lt;1.5)</b>         | 242       | 1430           |                   | 1.65 (1.30-2.10) | <0.001  |                 | 1.09 (0.81-1.46) | 0.6     |

Figure shows incremental prognostic value of maximal MBF in mild to moderately (1.5-2) and severely impaired CFR (<1.5). Hazard ratios are expressed per unit decrease in maximal MBF. Adjusted Cox model includes the following covariates: age, sex, hypertension, diabetes, dyslipidemia, dialysis, body mass index, known coronary artery disease, left ventricular ejection fraction, amount of myocardial scar/ischemia, revascularization post-PET, rate-pressure-product, type of radiotracer or stress agent. CFR, coronary flow reserve; CI, confidence interval; CV, cardiovascular; HR, hazard ratio; PET, positron emission tomography
